# Supplementary material for: bHLH proteins involved in Drosophila neurogenesis are mutually regulated at the level of stability
Source: Oxford University Press journal article supplement (doi:10.1093/nar/gkv083), 2015-02-18
Supplement: gkv083_Supplementary_Data.zip [file gkv083_Supplementary_Data.zip]

Archive with 1 entries (1 files):
- nar-02527-x-2014-File010.pdf
